# Supplementary material for: Molecular profiling of pre- and post-treatment pediatric high-grade astrocytomas reveals acquired increased tumor mutation burden in a subset of recurrences
Source: PubMed Central journal article supplement (PMC10481558; doi:10.1186/s40478-023-01644-4), 2023-09-05

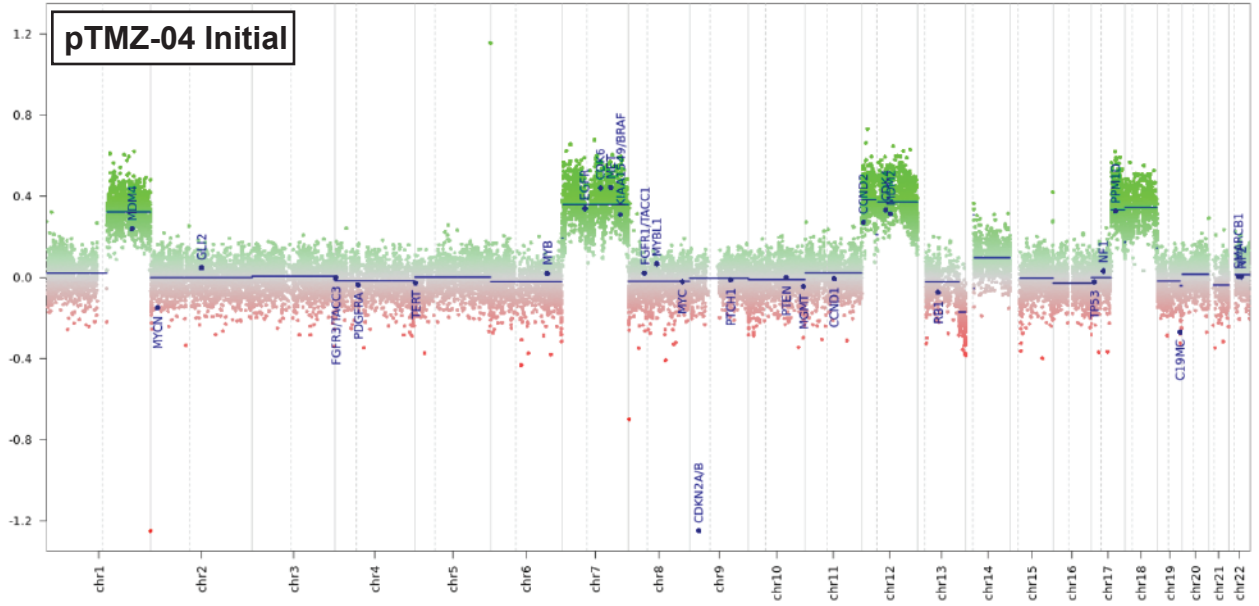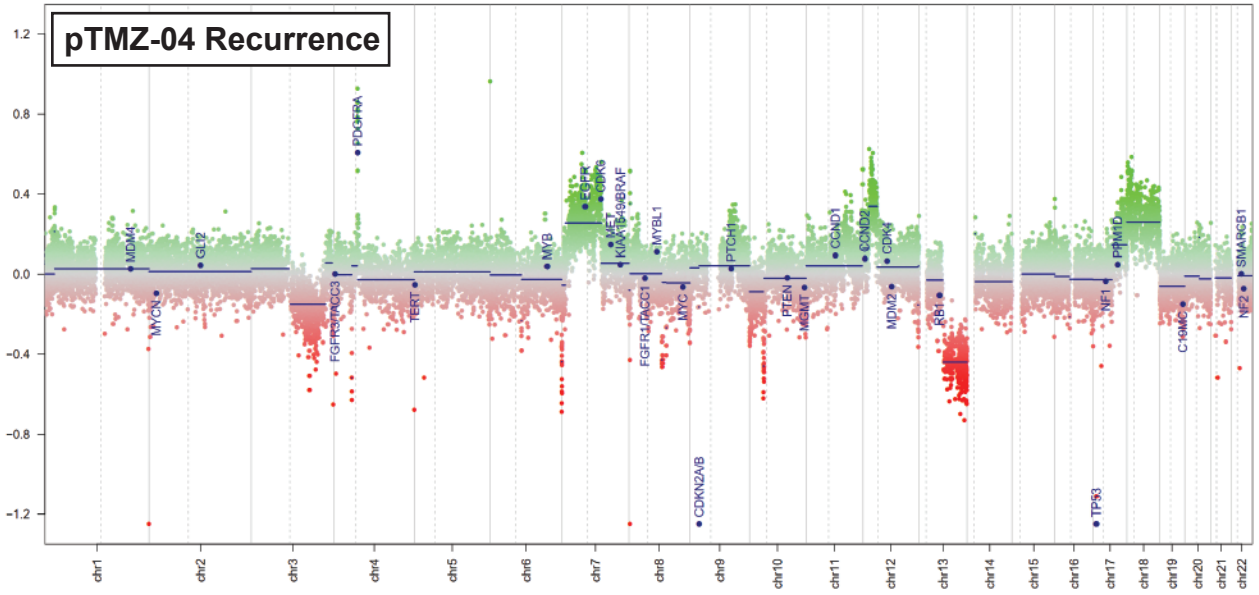

Supplement: 40478_2023_1644_MOESM6_ESM.pdf [file 40478_2023_1644_MOESM6_ESM.pdf]
